# Supplementary material for: Synthesis of magnetic adsorbents from bamboo fiber functionalized with ferrite–SiO2-PEI for efficient dye removal in wastewater treatment
Source: Royal Society of Chemistry journal article supplement (doi:10.1039/d5ra10014c), 2026-05-19
Supplement: d5ra10014c1.pdf [file d5ra10014c1.pdf]

## Synthesis of Magnetic Adsorbents from Bamboo Fiber Functionalized with Ferrite-SiO<sub>2</sub>-PEI for Efficient Dyes Removal in Wastewater Treatment

Ratchaneekorn Kampangta <sup>a</sup>, Chomsri Siriwong <sup>a</sup>, Narubeth Lorwanishpaisarn <sup>b</sup>, Kingkaew Chayakul Chanapattharapol <sup>a</sup>, Poonsuk Poosimma <sup>a</sup>

<sup>a.</sup> *Materials Chemistry Research Center, Department of Chemistry and Center of Excellence for Innovation in Chemistry, Faculty of Science, Khon Kaen University, Khon Kaen 40002, Thailand*

<sup>b.</sup> *Department of Biotechnology, Faculty of Technology, Khon Kaen University, Khon Kaen 40002, Thailand*

*Email: ppoons@kku.ac.th*

### 1. Standard curve

The standard calibration curve (Figure S1 and S2) of Congo red (CR) and Methylene blue (MB) shown a strong linear relationship between absorbance and concentration with 0, 10, 20, 50 and 100 mg/L. This linear calibration curve can therefore be effectively used to determine unknown CR and MB concentrations in subsequent adsorption or filtration experiments.
